# Supplementary material for: RING1 missense variants reveal sensitivity of DNA damage repair to H2A monoubiquitination dosage during neurogenesis.
Source: Research Square preprint supplement (doi:10.21203/rs.3.rs-3760059/v1), 2024-01-03
Supplement: Supplementary file 1 [file 28154f678f5091db1c4a1107.xlsx]

## Sheet: H2AK119ub1 CUT&RUN
ChIP sample	IGG Control	Wild-type H2AUb1 reference for normalization	Total number of reads aligned to HG38:				Total number of reads aligned E. Coli Spike in (NCBI Reference Sequence: NC_012967.1)
			sample (H2Aub1)	wild-type reference (H2Aub1)	sample (IGG)	wild-type reference (IGG)	sample (H2Aub1)	wild-type reference (H2Aub1)	sample (IGG)	wild-type reference (IGG)
RING1 +/+ H2AUb1 (7227 sample 2)	RING1 +/+ IGG (7227 Sample 1)	RING1 +/+ H2AUb1 (7227 sample 2)	14031376	14031376	1177691	1177691	51272	51272	156677	156677
RING1 Ms/+ H2AUb1 (7227 Sample 8)	RING1 Ms/+ IGG (7227 Sample 7)	RING1 +/+ H2AUb1 (7227 sample 2)	9581107	14031376	5587219	1177691	54913	51272	143905	156677
RING1 Ms/Ms H2AUb1 (7227 Sample 11)	RING1 Ms/Ms IGG (7227 Sample 10)	RING1 +/+ H2AUb1 (7227 sample 2)	6952282	14031376	5874250	1177691	76479	51272	617346	156677
RING1 -/- H2AUb1 (7227 Sample 14)	RING1 -/- H2AUb1 (7227 Sample 13)	RING1 +/+ H2AUb1 (7227 sample 2)	10938126	14031376	1505057	1177691	53625	51272	127597	156677
RNF2 Ms/Ms H2AUb1 (7227 Sample 5)	RNF2 Ms/Ms H2AUb1 (7227 Sample 4)	RING1 +/+ H2AUb1 (7227 sample 2)	14118039	14031376	9562092	1177691	66390	51272	79081	156677
RING1 +/+ H2AUb1 (8287 Sample 2)	RING1 +/+ IGG (8287 Sample 1)	RING1 +/+ H2AUb1 (8287 Sample 2)	8592335	8592335	4482271	4482271	27934	27934	132650	132650
RING1 Ms/+ H2AUb1 (8287 Sample 11)	RING1 Ms/+ IGG (8287 Sample 10)	RING1 +/+ H2AUb1 (8287 Sample 2)	14088266	8592335	116084	4482271	33596	27934	23381	132650
RING1 Ms/Ms H2AUb1 (8287 Sample 8)	RING1 Ms/Ms IGG (8287 Sample 7)	RING1 +/+ H2AUb1 (8287 Sample 2)	12079597	8592335	11079672	4482271	42376	27934	89992	132650
RING1 -/- H2AUb1 (8287 Sample 5)	RING1 -/- IGG (8287 Sample 4)	RING1 +/+ H2AUb1 (8287 Sample 2)	14619737	8592335	6737958	4482271	42009	27934	216789	132650
RNF2 Ms/Ms H2AUb1 (8287 Sample 14)	RNF2 Ms/Ms IGG (8287 Sample 13)	RING1 +/+ H2AUb1 (8287 Sample 2)	7805044	8592335	3503427	4482271	24027	27934	183904	132650
MERGED RING1 +/+ H2AUb1 (7227 Sample 2 + 8287 Sample 2)	MERGED RING1 +/+ IGG (7227 Sample 1 + 8287 Sample 1)	MERGED RING1 +/+ H2AUb1 (7227 Sample 2 + 8287 Sample 2)	22623711	22623711	5659962	5659962	79206	79206	289327	289327
MERGED RING1 Ms/+ H2AUb1 (7227 Sample 8 + 8287 Sample 11)	MERGED RING1 Ms/+ IGG (7227 Sample 7 + 8287 Sample 10)	MERGED RING1 +/+ H2AUb1 (7227 Sample 2 + 8287 Sample 2)	23669373	22623711	5703303	5659962	88509	79206	167286	289327
MERGED RING1 Ms/Ms H2AUb1 (7227 Sample 11 + 8287 Sample 8)	MERGED RING1 Ms/Ms IGG (7227 Sample 10 + 8287 Sample 7)	MERGED RING1 +/+ H2AUb1 (7227 Sample 2 + 8287 Sample 2)	19031879	22623711	16953922	5659962	118855	79206	707338	289327
MERGED RING1 -/- H2AUb1 (7227 Sample 14 + 8287 Sample 5)	MERGED RING1 -/- IGG (7227 Sample 13 + 8287 Sample 4)	MERGED RING1 +/+ H2AUb1 (7227 Sample 2 + 8287 Sample 2)	25557863	22623711	8243015	5659962	95634	79206	344386	289327
MERGED RNF2 Ms/Ms H2AUb1 (7227 Sample 5 + 8287 Sample 14)	MERGED RNF2 Ms/Ms IGG (7227 Sample 4 + 8287 Sample 13)	MERGED RING1 +/+ H2AUb1 (7227 Sample 2 + 8287 Sample 2)	21923083	22623711	13065519	5659962	90417	79206	262985	289327
Spike in Normalization Factors:
	H2AUb1 Normalization Factor: Fraction of Normalized Mapped Reads Relative to WT	BigWig Scaling Factor (to apply spike-in normalization when converting bam to bigwig))
MERGED RING1 +/+ H2AUb1	1	6.45383
MERGED RING1 Ms/+ H2AUb1	0.537219	3.31395
MERGED RING1 Ms/Ms H2AUb1	0.457551	3.51026
MERGED RING1 -/- H2AUb1	0.764699	4.36865
MERGED RNF2 Ms/Ms H2AUb1	0.334252	2.22615

## Sheet: RING1 and RNF2 CUT&RUN
RING1 ChIP Sample	RNF2 ChIP Sample	IGG Control	Total number of reads aligned to HG38:
			sample (RING1)	sample (RNF2)	sample (IGG)
8728-SR-3 RING1 +/+ R1	8728-SR-4 RING1 +/+ R2	8728-SR-1 RING1 +/+ IGG	9427584	9433058	24728158
8728-SR-7 RING1 Ms/Ms R1	8728-SR-8 RING1 Ms/Ms R2	8728-SR-5 RING1 Ms/Ms IGG	5856951	9950399	228617
8728-SR-11 RNF2 R1	8728-SR-12 RNF2 R2	8728-SR-9 RNF2 IGG	7125155	156029	3472211
8759-SR-3 Rep 2 RING1 +/+ Ring1	8759-SR-4 Rep 2 RING1 +/+ Rnf2	8759-SR-1 Rep 2 WT RING1 +/+	19192520	20136804	15843274
8759-SR-7 Rep 2 anti-RING1 RING1 Ms/Ms	8759-SR-8 Rep 2 anti-RNF2 RING1 Ms/Ms	8759-SR-5 Rep 2 R1 IGG	20100644	17584185	9585694
8759-SR-11 Rep 2 Ring1 RNF2_MS_MS	8759-SR-12 Rep 2 Rnf2 RNF2_MS_MS	8759-SR-9 Rep 2 R2 IGG	19351910	27501740	15888962
MERGED RING1 +/+ antiRING1 (8728-SR-3 + 8759-SR-3)	MERGED RING1 +/+ antiRNF2 (8728-SR-4 + 8759-SR-4)	MERGED WT RING1 +/+ (8728-SR-1 + 8759-SR-1)	28620104	29569862	40571432
MERGED RING1_MS_MS antiRING1 (8728-SR-7 + 8759-SR-7)	MERGED RING1_MS_MS antiRNF2 (8728-SR-8 + 8759-SR-8)	MERGED RING1_MS_MS IGG (8728-SR-5 + 8759-SR-5)	25957595	27534584	9814311
MERGED RNF2_MS_MS antiRING1 (8728-SR-11 + 8759-SR-11)	MERGED RNF2_MS_MS antiRNF2 (8728-SR-12 + 8759-SR-12)	MERGED RNF2_MS_MS IGG (8728-SR-9 + 8759-SR-9)	26477065	27657769	19361173
